# Supplementary material for: Impacts of Observed Extreme Antarctic Sea Ice Conditions on the Southern Hemisphere Atmosphere
Source: MDPI journal article supplement (doi:10.3390/atmos14010036), 2022-12-24
Supplement: s1 [file s1]

Archive with 1 entries (1 files):
- atmosphere-2084455-supplementary.pdf
