# Supplementary material for: Impacts of Observed Extreme Antarctic Sea Ice Conditions on the Southern Hemisphere Atmosphere
Source: MDPI journal article supplement (doi:10.3390/atmos14010036), 2022-12-24
Supplement: s1 [file s1 › atmosphere-2084455-supplementary.pdf]

Supporting Information for

# **Impacts of Observed Extreme Antarctic Sea Ice Conditions on the Southern Hemisphere Atmosphere**

Zhu Zhu <sup>1,2</sup> and Mirong Song <sup>1,3,\*</sup>

<sup>1</sup> *State Key Laboratory of Numerical Modeling for Atmospheric Sciences and Geophysical Fluid Dynamics, Institute of Atmospheric Physics, Chinese Academy of Sciences, Beijing 100029, China*

<sup>2</sup> *College of Earth and Planetary Sciences, University of Chinese Academy of Sciences, Beijing 100049, China*

<sup>3</sup> *Southern Marine Science and Engineering Guangdong Laboratory (Zhuhai), Zhuhai 519080, China*

\* *Correspondence: [songmirong@lasg.iap.ac.cn](mailto:songmirong@lasg.iap.ac.cn)*

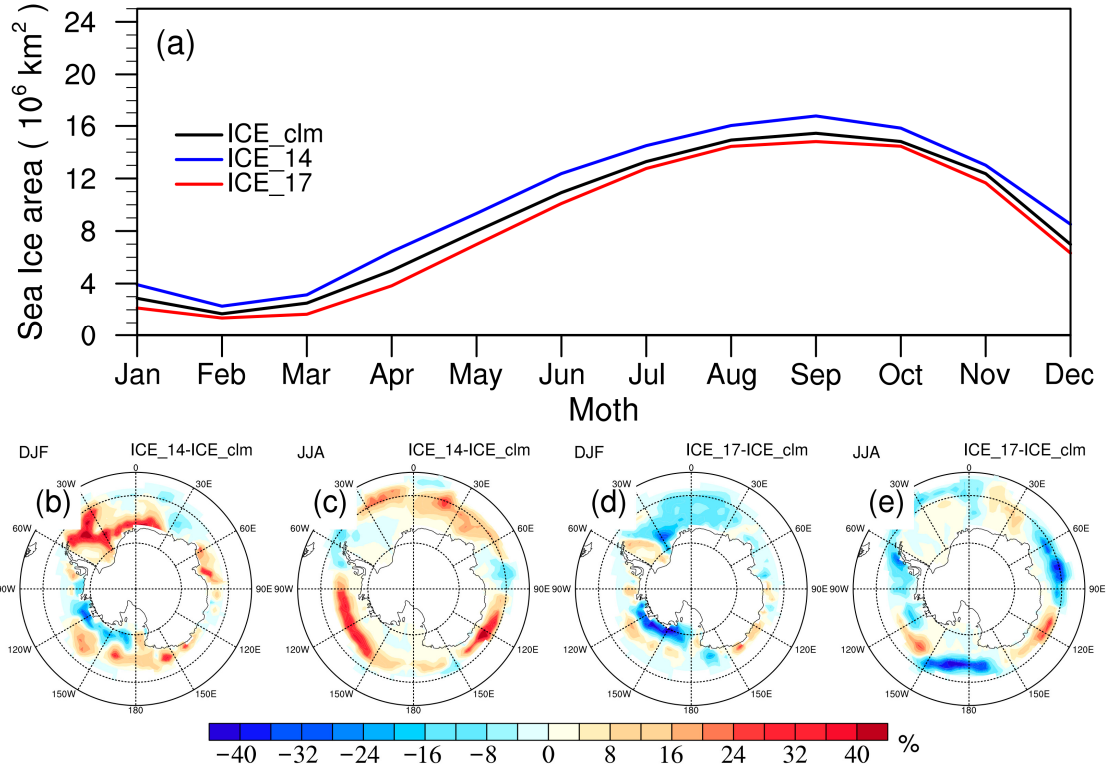

**Figure S1.** Seasonal cycle of prescribed Antarctic sea ice area and difference of sea ice concentration between sensitivity experiments and control run. (a) Seasonal cycle of Antarctic sea ice area prescribed in ICE\_2014, ICE\_2017 and ICE\_clm. Difference of Antarctic sea ice forcing between ICE\_2014 and ICE\_clm in (b) summer and (c) winter. Difference of Antarctic sea ice forcing between ICE\_2017 and ICE\_clm in (d) summer and (e) winter.

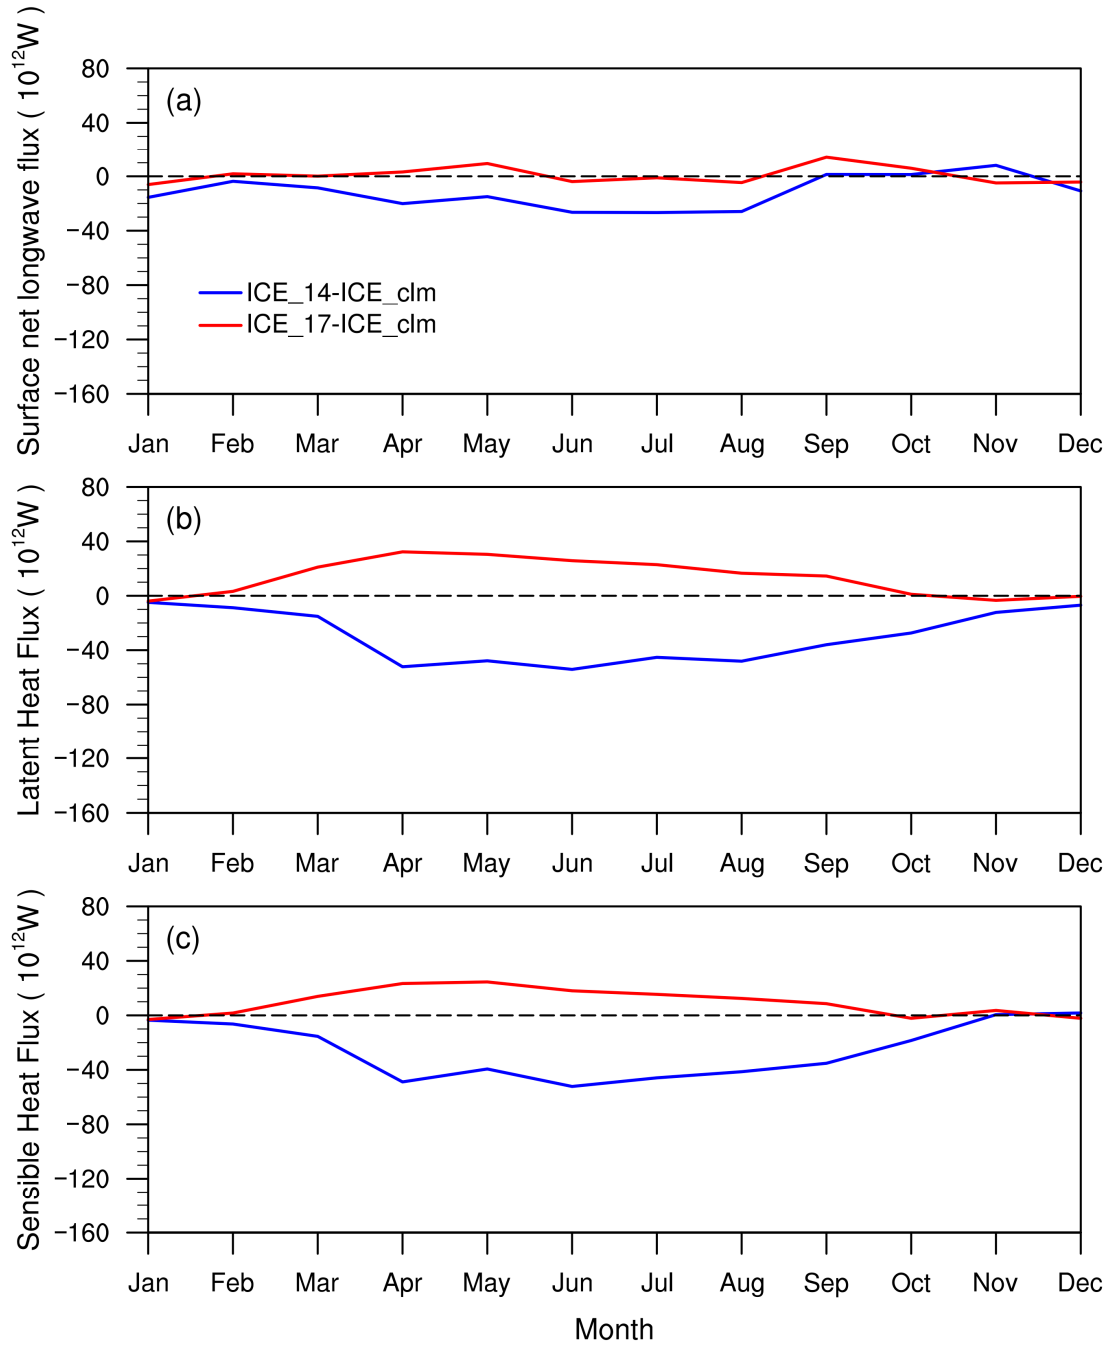

**Figure S2.** Changes in the surface heat flux due to changes in Antarctic sea ice. Difference of sum of (a) surface net longwave heat flux, (b) latent heat flux and (c) sensible heat flux over all grids where sea ice changes between ICE\_2014 and ICE\_clm (blue line) and ICE\_2017 and ICE\_clm (red line).

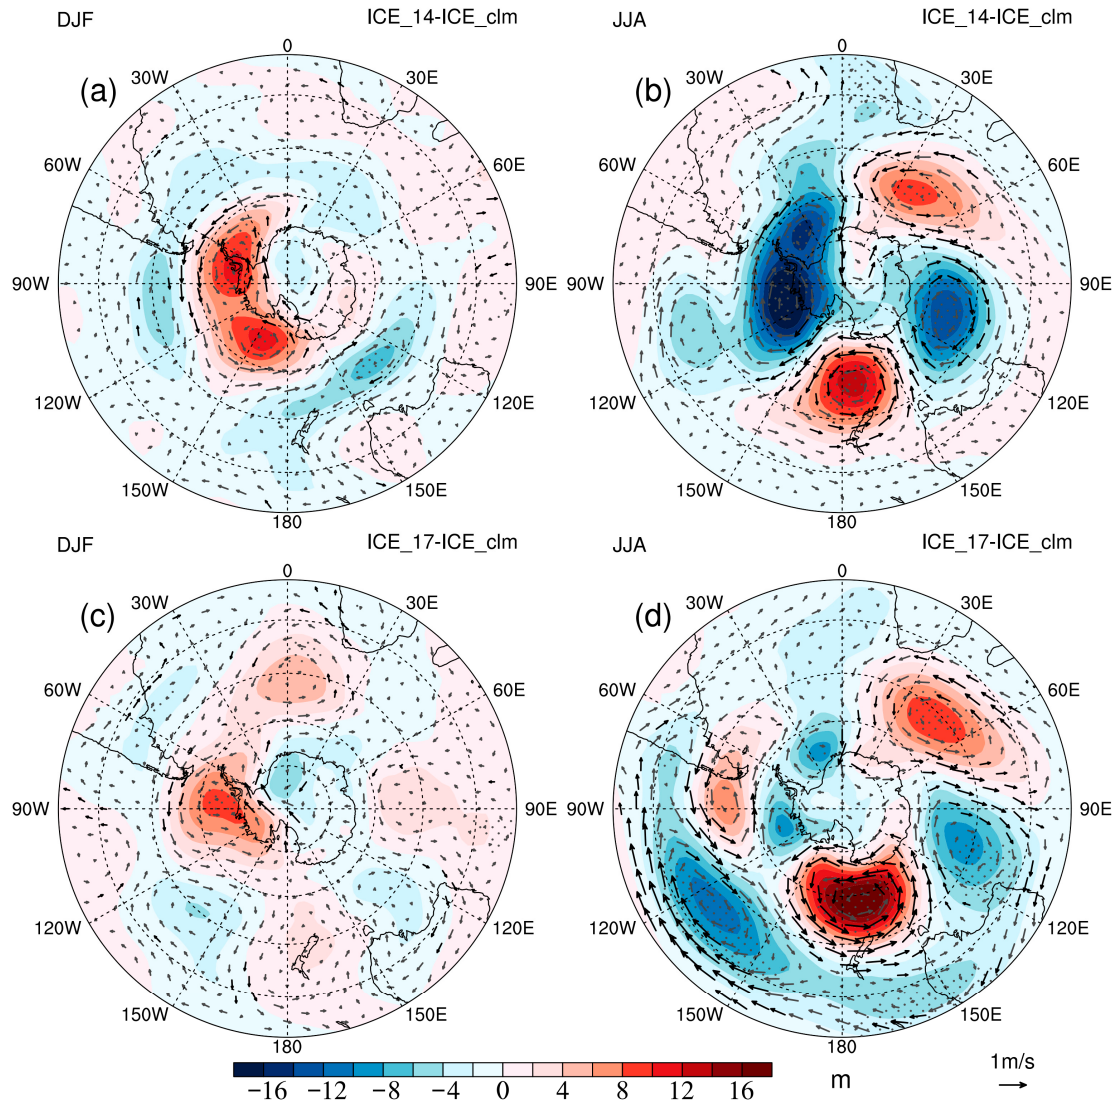

**Figure S3.** Changes in geopotential height and winds at 500hPa due to changes in Antarctic sea ice. Differences between ICE\_2014 and ICE\_clm in (a) summer and (b) winter. Differences between ICE\_2017 and ICE\_clm in (c) summer and (d) winter. Dotted areas indicate statistically significant at 95% confidence level.

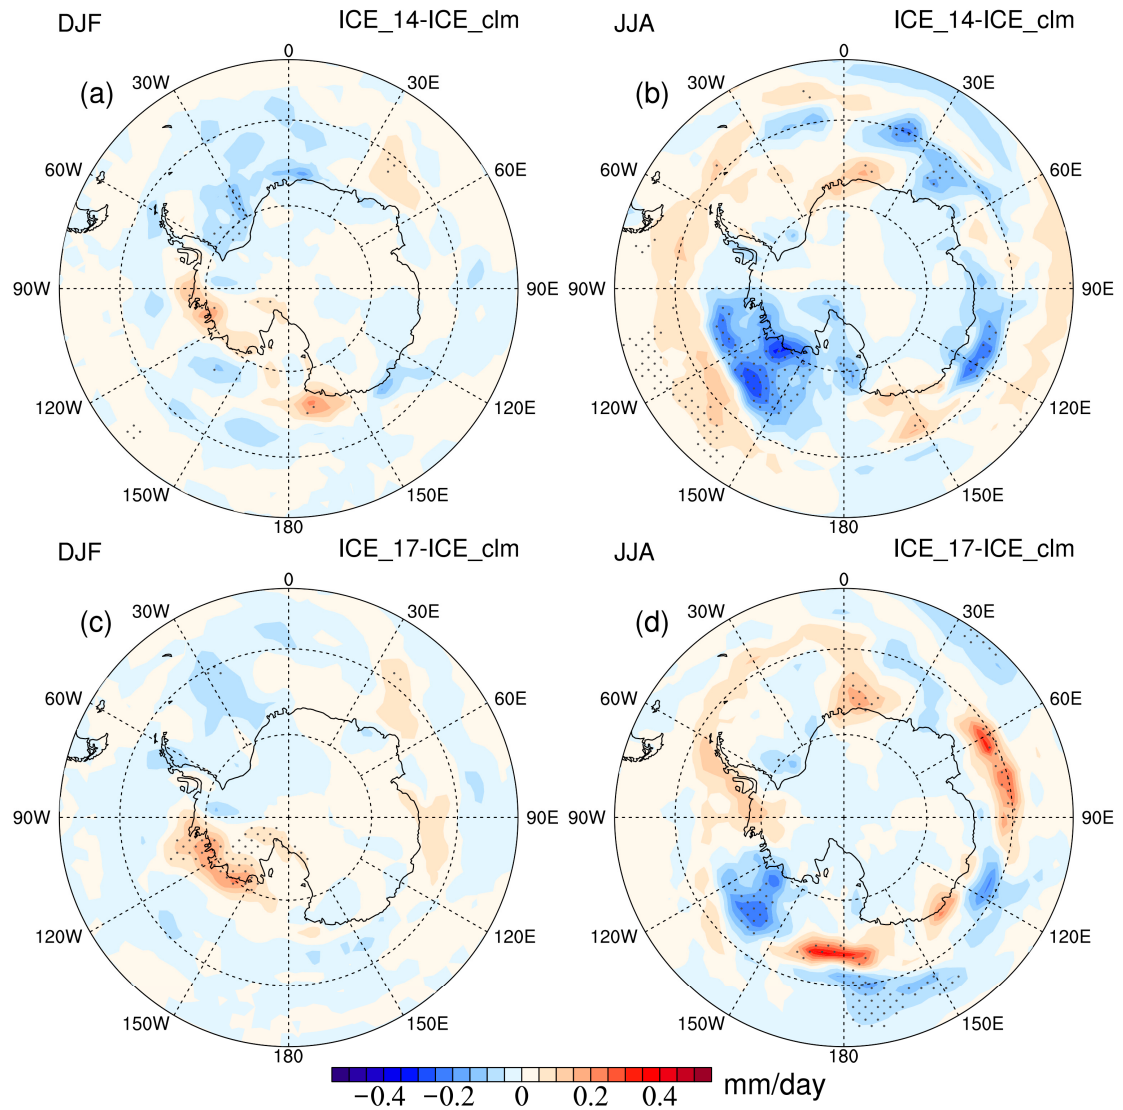

**Figure S4.** Changes in snowfall due to changes in Antarctic sea ice. Differences between ICE\_2014 and ICE\_clm in (a) summer and (b) in winter. Differences between ICE\_2017 and ICE\_clm in (c) summer and (d) in winter. Dotted areas indicate statistically significant at 95% confidence level.
